# Supplementary material
Source: HighWire-hosted journal article supplement (https://bmjopen.bmj.com/content/14/7/e077458)
Supplement: inline-supplementary-material-2 [file inline-supplementary-material-2.pdf]

**Supplementary material, table S1.** Background characteristics for responders and non-responders

| Background characteristics                        | Responders<br>(n=2221) | Non-responders<br>(n=598) | p-value |
|---------------------------------------------------|------------------------|---------------------------|---------|
| Maternal age at birth (mean, SD)                  | 30.0 (4.28)            | 27.9 (4.77)               | <0.001  |
| BMI (mean, SD)                                    | 24.5 (4.50)            | 24.9 (5.11)               | 0.05    |
| Missing                                           | 107 (4.8)              | 37 (6.2)                  |         |
| Marital status                                    |                        |                           | <0.001  |
| Married or living with a partner                  | 2015 (90.7)            | 484 (80.9)                |         |
| Not living with a partner or other life situation | 110 (5.0)              | 87 (14.5)                 |         |
| Missing                                           | 96 (4.3)               | 27 (4.5)                  |         |
| Ethnicity                                         |                        |                           |         |
| Nordic                                            | 1684 (75.8)            | 241 (40.3)                | <0.001  |
| European                                          | 215 (9.7)              | 99 (16.6)                 | <0.001  |
| African                                           | 37 (1.7)               | 47 (7.9)                  | <0.001  |
| Middle Eastern                                    | 122 (5.5)              | 134 (22.4)                | <0.001  |
| South American                                    | 33 (1.5)               | 12 (2.0)                  | 0.35    |
| Asian                                             | 117 (5.3)              | 54 (9.0)                  | <0.001  |
| Missing data                                      | 13 (0.6)               | 11 (1.8)                  |         |

Data are n (%) or mean (SD). BMI = body mass index. Comparisons between groups are calculated using students *t* test (continuous variables) and  $\chi^2$  test (dichotomous variables).
